# Supplementary material for: Selective Role of an NH2-Terminal WxxLF Motif for Aberrant Androgen Receptor Activation in Androgen Depletion–Independent Prostate Cancer Cells
Source: Oxford University Press journal article supplement (doi:10.1158/0008-5472.can-07-1267), 2007-10-15
Supplement: 00085472can071267-sup-supplemental_m_m_fig_legends_1-3.pdf [file 00085472can071267-sup-supplemental_m_m_fig_legends_1-3.pdf]

## Supplemental Materials and Methods

### *Plasmid Construction Details*

p5H5hAR-A, encoding wild-type human (h)AR was rendered resistant to an AR-targeted small-interference RNA (siRNA) by introducing three silent mutations at AR codons 314, 315, and 316 (GGGGGCTAT, mutant bases underlined) using a QuikChange (Stratagene) site-directed mutagenesis kit (referred to as hAR<sup>sr</sup>).

To generate the EGFP-expressing AR replacement vector, a cassette encoding AR-targeted short-hairpin RNA (shRNA) was ligated downstream of the histone H1 promoter in the pCMS4-H1p-EGFP vector by annealing sense (5'-

gatccccCAAGGGAGGTTACACCAAAttcaagagaTTTGGTGTAACCTCCCTTGtttttgga  
a) and antisense (5'-

agcttttccaaaaCAAGGGAGGTTACACCAAAtctcttgaaTTTGGTGTAACCTCCCTTGgg  
g) fragments and ligating the resultant dsDNA into BglII/HindIII-digested pCMS4-H1p-EGFP. Versions of siRNA-resistant AR were liberated from p5HBhAR-A, and ligated downstream of the CMV promoter in the AR shRNA-containing version of pCMS4-H1p-EGFP.

Point mutant versions of hAR<sup>sr</sup> and hAR<sup>Gal4</sup> were generated using QuikChange site-directed mutagenesis coupled with appropriately designed mutagenic primers. Deletion mutant versions of hAR<sup>Gal4</sup> and NTD<sup>Gal4</sup> were generated by using QuikChange mutagenesis to create *Bss*HII sites flanking the desired deletion, digesting with *Bss*HII,

and re-ligating the plasmid. hAR<sup>Gal4</sup>ΔTAU5/whltf+, hAR<sup>Gal4</sup>ΔTAU5/ahtaa+, hAR<sup>Gal4</sup>ΔTAU5/2Xwhltf+, and hAR<sup>Gal4</sup>ΔTAU5/3Xwhltf+ were generated by inserting synthetic double-stranded cassettes with flanking *Bss*HII sites into *Bss*HII-digested hAR<sup>Gal4</sup>ΔTAU5. Fusions between the Gal4 DBD (pM, Clontech) and WHTLF- or AHTAA-containing peptides were constructed using the same strategy.

Details of the primers used for mutagenesis reactions will be made available upon request. All deletion and point-mutant constructs were sequenced to verify their integrity and tested for expression via transient transfection and Western blot with anti-AR and anti-Gal4 antibodies.

### **Supplemental Figure Legends**

**Supplemental Figure 1.** AR does not display ligand-independent activity in androgen-dependent LNCaP cells. LNCaP cells were transfected with ARE-driven or GAL4-driven, PSA-based reporter constructs along with wild-type (WT) AR<sup>Gal4</sup> or AR<sup>Gal4</sup>ΔTAU5 as indicated. Cells were grown in serum-free medium for 48h. Luciferase activity was determined. Data represent the mean +/- S.E. from at least three independent experiments, each performed in duplicate.

**Supplemental Figure 2.** TAU5 is dispensable for AR activity in response to 1nM mibolerone in ADI C4-2 cells. C4-2 cells were transfected with MMTV-LUC along with wild-type and ΔTAU5 versions of AR<sup>sr</sup> as indicated and treated with 1nM Mib or

vehicle control (EtOH) for 24h. Luciferase activity was determined. Data represent the mean  $\pm$  S.E. from at least three independent experiments, each performed in duplicate.

**Supplemental Figure 3.** ADI 22Rv1 cells display ligand- and AF-2 independent AR activity. *A*, ADI 22Rv1 cells were grown in serum-free conditions for 48h, and treated with 1nM mibolerone (Mib), 10 $\mu$ M casodex (CDX), or combinations of these compounds for an additional 24h. PSA mRNA levels were determined by Northern blot. Glyceraldehyde-3-phosphate dehydrogenase (GAPDH) mRNA levels and ethidium bromide staining of ribosomal RNA subunits are shown as controls. AR protein expression was concurrently determined by Western blot. ERK-2 protein expression is shown as a control. *B*, 22Rv1 cells were transfected in androgen-free conditions with separate siRNAs targeted to the AR or a non-targeted control (ctrl) siRNA. Levels of PSA and GAPDH mRNAs, ribosomal RNA subunits, as well as AR and ERK-2 proteins were determined as described for panel A. We have previously shown that casodex selectively inhibits AF-2-dependent but not AF-2 independent AR activity (1). Because ligand-independent PSA expression in 22Rv1 cells is AR dependent (*B*), but resistant to casodex (*A*), we conclude that this activity is AF-2 independent.

### Supplemental References

1. Dehm, S. M. and Tindall, D. J. Ligand-independent androgen receptor activity is activation function-2-independent and resistant to antiandrogens in androgen refractory prostate cancer cells. *J Biol Chem*, 281: 27882-27893, 2006.
